# Supplementary material for: Long-Term Impact of Phosphorous Fertilization on Yield and Alternate Bearing in Intensive Irrigated Olive Cultivation
Source: MDPI journal article supplement (doi:10.3390/plants10091821), 2021-09-01
Supplement: s1 [file s1]

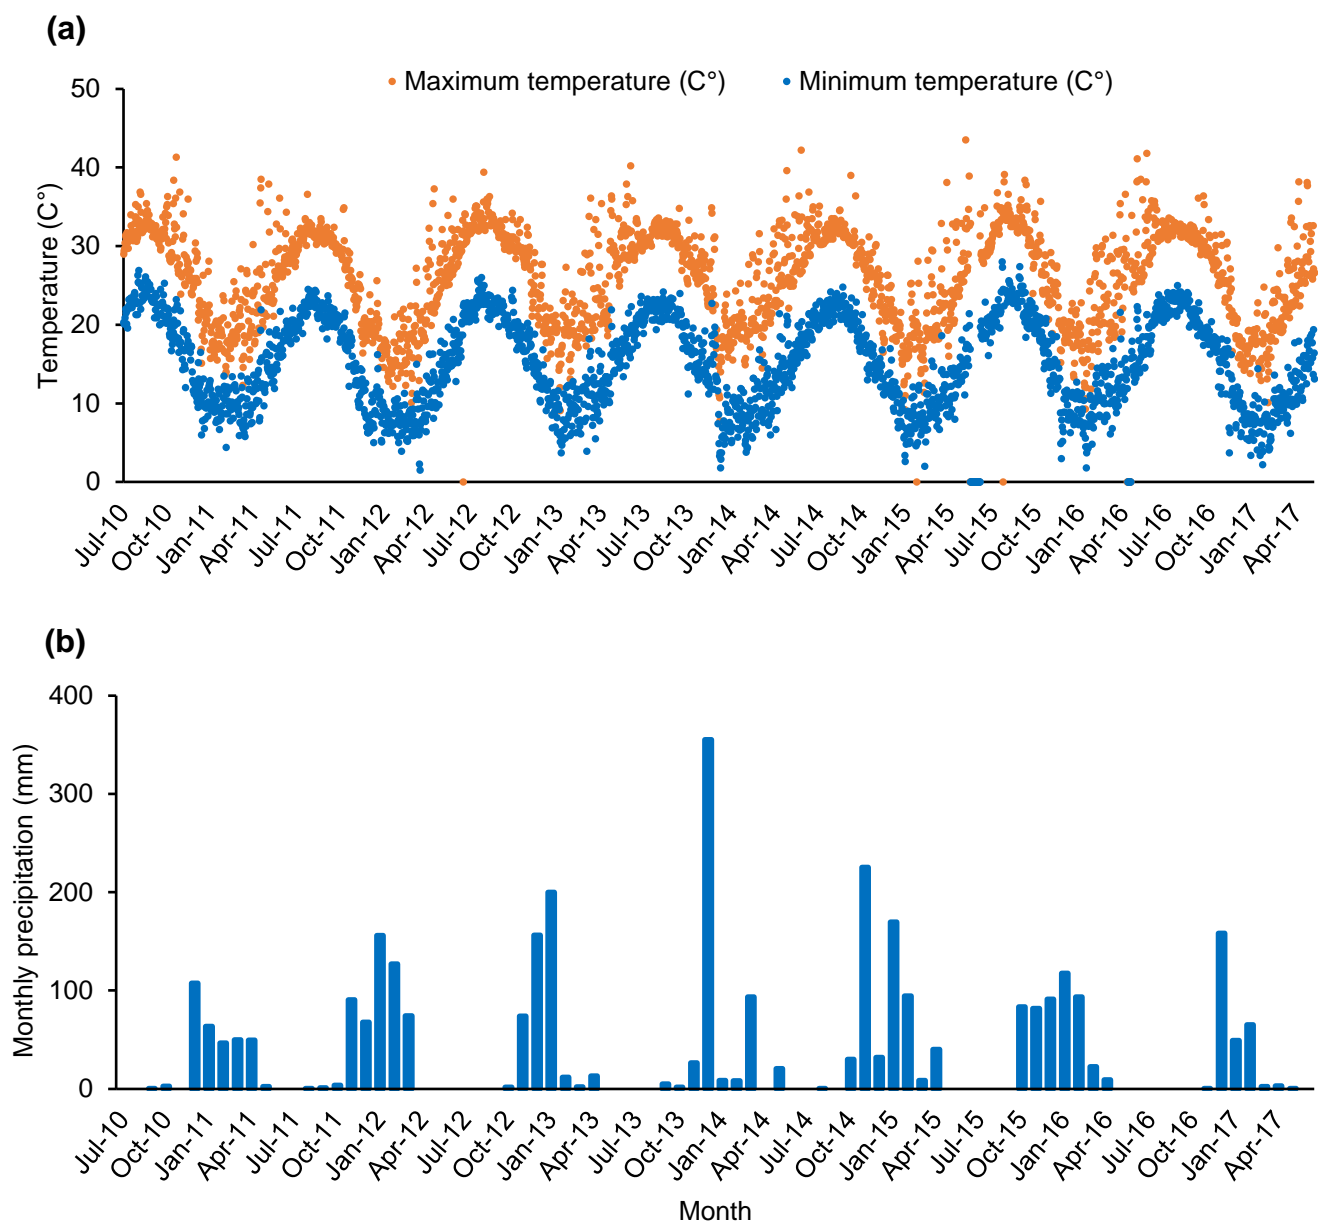

Figure S2: **Meteorological data.** Daily maximum and minimum temperature (a) and monthly precipitation (b) were obtained from a nearby meteorological station (Negba) of the Israeli Ministry of Agriculture and Rural Development.
