# Supplementary material for: Long-Term Impact of Phosphorous Fertilization on Yield and Alternate Bearing in Intensive Irrigated Olive Cultivation
Source: MDPI journal article supplement (doi:10.3390/plants10091821), 2021-09-01
Supplement: s1 [file s1]

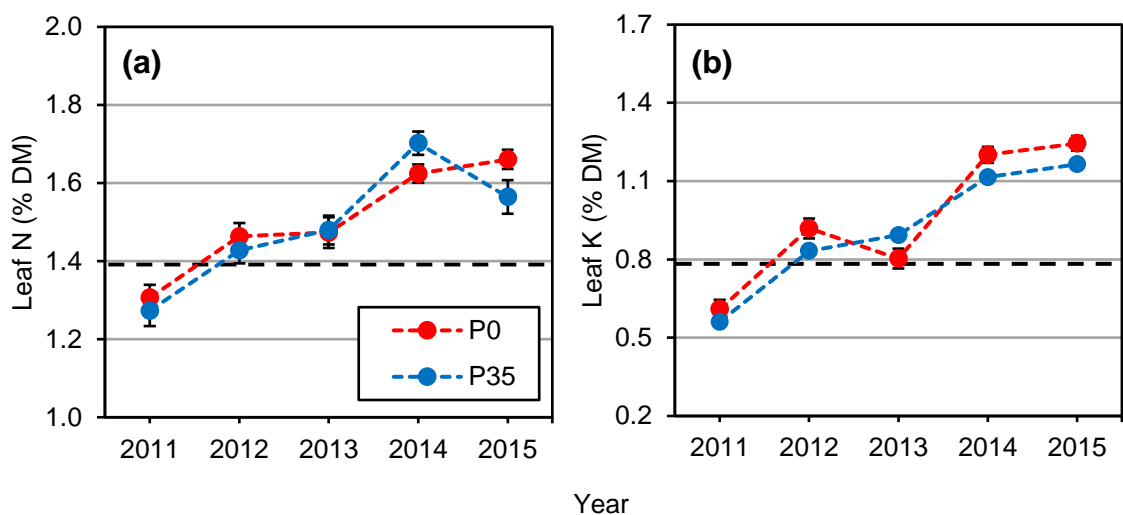

**Figure S1.** Effect of P fertilization on leaf N and K content as percent of dry mass (DM). Experiment plots were fertilized either with an annual amount of 35 kg P ha<sup>-1</sup> (P35) or without P (P0). (a) Leaf N content. (b) Leaf K content. Numbers are mean values of 14 replicates (trees)  $\pm$  standard error of the mean (bars). The horizontal dashed line indicates the putative deficiency-sufficiency threshold for N (a) and K (b) in leaves.
