# Supplementary material for: Long-Term Impact of Phosphorous Fertilization on Yield and Alternate Bearing in Intensive Irrigated Olive Cultivation
Source: MDPI journal article supplement (doi:10.3390/plants10091821), 2021-09-01
Supplement: s1 [file s1]

**Table S1: Seasonal pruning weight.**

| P Fertilization<br>(kg ha <sup>-1</sup> season <sup>-1</sup> ) | Pruning weight (kg tree <sup>-1</sup> season <sup>-1</sup> ) |            |            |            |                   |
|----------------------------------------------------------------|--------------------------------------------------------------|------------|------------|------------|-------------------|
|                                                                | 2012                                                         | 2013       | 2014       | 2015       | 2012-2015<br>mean |
| 0                                                              | 26.2±2.6 a                                                   | 14.3±1.3 b | 58.9±5.3 a | 25.0±3.0 b | 31.1±1.9 a        |
| 35                                                             | 25.1±3.2 a                                                   | 22.2±3.3 a | 50.7±4.8 a | 38.1±5.3 a | 34.0±2.5 a        |

Numbers are mean values of 14 replicates (trees) ± standard error of the mean. Different letters indicate a statistically significant difference between P fertilization levels in the specified season ( $P \leq 0.05$ ).

**Table S2: Seasonal flowering intensity.**

| P Fertilization<br>(kg ha <sup>-1</sup> season <sup>-1</sup> ) | Flowering intensity (index) |            |            |            |            |                   |
|----------------------------------------------------------------|-----------------------------|------------|------------|------------|------------|-------------------|
|                                                                | 2012                        | 2014       | 2015       | 2016       | 2017       | 2014-2017<br>mean |
| 0                                                              | 3.4±0.27 b                  | 1.0±0.43 b | 4.2±0.43 a | 2.5±0.39 b | 4.5±0.27 a | 3.05±0.07 b       |
| 35                                                             | 4.5±0.14 a                  | 3.3±0.41 a | 2.9±0.53 a | 3.8±0.33 a | 3.5±0.40 b | 3.34±0.11 a       |

Numbers are mean values of 14 replicates (trees) ± standard error of the mean. Different letters indicate a statistically significant difference between P fertilization levels in the specified season ( $P \leq 0.05$ ).

**Table S3: Seasonal inflorescences initiation rate.**

| P Fertilization<br>(kg ha <sup>-1</sup> season <sup>-1</sup> ) | Inflorescences initiation (%) |            |                   |
|----------------------------------------------------------------|-------------------------------|------------|-------------------|
|                                                                | 2014                          | 2015       | 2014-2015<br>mean |
| 0                                                              | 16.6±6.3 b                    | 56.0±6.8 a | 36.3±2.4 b        |
| 35                                                             | 55.0±6.4 a                    | 34.3±7.3 b | 44.5±3.2 a        |

Numbers are mean values of 14 replicates (trees) ± standard error of the mean. Different letters indicate a statistically significant difference between P fertilization levels in the specified season ( $P \leq 0.05$ ).

**Table S4: Seasonal single fruit weight.**

| P Fertilization<br>(kg ha <sup>-1</sup> season <sup>-1</sup> ) | Single fruit weight (g) |            |            |            |            |            |                   |
|----------------------------------------------------------------|-------------------------|------------|------------|------------|------------|------------|-------------------|
|                                                                | 2011                    | 2012       | 2013       | 2014       | 2015       | 2016       | 2013-2016<br>mean |
| 0                                                              | 2.4±0.13 b              | 3.1±0.19 a | 1.9±0.18 b | 3.1±0.22 a | 2.6±0.07 a | 2.6±0.31 a | 2.66±0.11 a       |
| 35                                                             | 3.0±0.24 a              | 3.1±0.18 a | 2.6±0.19 a | 2.7±0.18 a | 2.6±0.10 a | 1.3±0.19 b | 2.42±0.09 a       |

Numbers are mean values of 14 replicates (trees) ± standard error of the mean. Different letters indicate a statistically significant difference between P fertilization levels in the specified season ( $P \leq 0.05$ ).

**Table S5: Seasonal fruit oil content.**

| P Fertilization<br>(kg ha <sup>-1</sup> season <sup>-1</sup> ) | Oil content (%) |            |            |            |            |            |            |                   |
|----------------------------------------------------------------|-----------------|------------|------------|------------|------------|------------|------------|-------------------|
|                                                                | 2010            | 2011       | 2012       | 2013       | 2014       | 2015       | 2016       | 2013-2016<br>mean |
| 0                                                              | 27.2±0.6 a      | 19.4±0.5 a | 23.8±0.6 a | 25.9±0.7 a | 18.3±0.7 a | 15.6±0.5 a | 20.5±0.8 b | 19.2±0.5 a        |
| 35                                                             | 25.7±1.1 a      | 20.2±0.2 a | 19.9±1.0 b | 22.3±0.7 b | 16.5±0.9 a | 16.2±0.7 a | 24.9±0.6 a | 19.6±0.6 a        |

Numbers are mean values of 14 replicates (trees) ± standard error of the mean. Different letters indicate a statistically significant difference between P fertilization levels in the specified season ( $P \leq 0.05$ ).

**Table S6: Seasonal number of fruit per tree.**

| P Fertilization<br>(kg ha <sup>-1</sup> season <sup>-1</sup> ) | Fruit per tree (g) |              |              |              |              |              |                |
|----------------------------------------------------------------|--------------------|--------------|--------------|--------------|--------------|--------------|----------------|
|                                                                | 2011               | 2012         | 2013         | 2014         | 2015         | 2016         | 2013-2016 mean |
| 0                                                              | 21197±1963 a       | 10772±2386 a | 25820±3468 a | 4281±2006 b  | 16486±2303 a | 10657±4441 b | 14,153±825 b   |
| 35                                                             | 16442±2312 a       | 14599±1700 a | 19706±4101 a | 16665±3631 a | 10227±2804 a | 32147±5692 a | 19,813±1141a   |

Numbers are mean values of 14 replicates (trees) ± standard error of the mean. Different letters indicate a statistically significant difference between P fertilization levels in the specified season ( $P \leq 0.05$ ).

**Table S7: Seasonal fruit yield.**

| P Fertilization<br>(kg ha <sup>-1</sup> season <sup>-1</sup> ) | Fruit yield (kg tree <sup>-1</sup> season <sup>-1</sup> ) |            |            |            |            |            |            |                   |
|----------------------------------------------------------------|-----------------------------------------------------------|------------|------------|------------|------------|------------|------------|-------------------|
|                                                                | 2010                                                      | 2011       | 2012       | 2013       | 2014       | 2015       | 2016       | 2013-2016<br>mean |
| 0                                                              | 45.9±1.9 a                                                | 48.2±2.9 a | 31.3±4.6 a | 43.9±4.0 a | 10.8±4.6 b | 41.4±5.7 a | 11.9±4.8 b | 27.2±1.1 b        |
| 35                                                             | 49.5±2.4 a                                                | 42.7±4.6 a | 41.8±3.2 a | 41.9±6.5 a | 37.6±6.4 a | 25.0±6.4 a | 32.7±5.3 a | 34.0±1.6 a        |

Numbers are mean values of 14 replicates (trees) ± standard error of the mean. Different letters indicate a statistically significant difference between P fertilization levels in the specified season ( $P \leq 0.05$ ).

**Table S8: Seasonal estimated oil yields.**

| P Fertilization<br>(kg ha <sup>-1</sup> season <sup>-1</sup> ) | Oil yield (kg tree <sup>-1</sup> season <sup>-1</sup> ) |           |           |           |           |           |           |                   |
|----------------------------------------------------------------|---------------------------------------------------------|-----------|-----------|-----------|-----------|-----------|-----------|-------------------|
|                                                                | 2010                                                    | 2011      | 2012      | 2013      | 2014      | 2015      | 2016      | 2013-2016<br>mean |
| 0                                                              | 10.6±0.4 a                                              | 7.6±0.7 a | 6.1±0.7 a | 9.6±0.9 a | 1.6±0.6 b | 5.3±0.7 a | 2.1±0.8 b | 4.6±0.2 b         |
| 35                                                             | 10.7±0.5 a                                              | 7.3±0.8 a | 6.9±0.5a  | 7.8±1.3 a | 5.1±0.9 a | 3.6±1.0 a | 6.8±1.1 a | 5.6±0.4 a         |

Numbers are mean values of 14 replicates (trees) ± standard error of the mean. Different letters indicate a statistically significant difference between P fertilization levels in the specified season ( $P \leq 0.05$ ).
