# Supplementary material for: Long-Term Impact of Phosphorous Fertilization on Yield and Alternate Bearing in Intensive Irrigated Olive Cultivation
Source: MDPI journal article supplement (doi:10.3390/plants10091821), 2021-09-01
Supplement: s1 [file s1]

**Table S9: Soil physical and chemical properties measured before the experiment (February 2010).**

| Soil depth<br>(cm) | Soil properties |             |             |                        |                                               |                                          |                                          |                          |                          |
|--------------------|-----------------|-------------|-------------|------------------------|-----------------------------------------------|------------------------------------------|------------------------------------------|--------------------------|--------------------------|
|                    | Sand<br>(%)     | Silt<br>(%) | Clay<br>(%) | SP <sup>a</sup><br>(%) | CEC <sup>b</sup><br>(meq100 g <sup>-1</sup> ) | K <sup>c</sup><br>(mg kg <sup>-1</sup> ) | P <sup>d</sup><br>(mg kg <sup>-1</sup> ) | CaCO <sub>3</sub><br>(%) | O.M. <sup>e</sup><br>(%) |
| 0-30               | 46.0±3.3        | 26.0±0.8    | 28.0±3.4    | 48.2±3.0               | 27.7±3.7                                      | 53.2±4.2                                 | 12.6±2.8                                 | 21.8±2.5                 | 0.56±0.03                |
| 30-60              | 43.8±5.0        | 26.8±2.3    | 29.4±5.5    | 47.2±6.0               | 26.9±4.8                                      | 43.2±2.6                                 | 6.5±1.5                                  | 25.2±4.1                 | 0.45±0.04                |
| 60-90              | 43.4±7.6        | 23.6±1.2    | 33.0±6.8    | 47.6±6.0               | 28.0±5.4                                      | 45.9±2.6                                 | 3.7±0.5                                  | 25.4±4.6                 | 0.39±0.03                |

Numbers are mean values of five sampling locations ± standard error of the mean.

<sup>a</sup> Saturation percentage.

<sup>b</sup> Cation exchange capacity, determined with sodium acetate extraction.

<sup>c</sup> CaCl<sub>2</sub> extraction.

<sup>d</sup> Olsen bicarbonate extraction.

<sup>e</sup> Organic matter content.

\*The average soil saturated paste extract pH value was 7.6.

\*Data was previously published in Haberman et al. (2019).
