# Supplementary material for: Long-Term Impact of Phosphorous Fertilization on Yield and Alternate Bearing in Intensive Irrigated Olive Cultivation
Source: Plants (Basel). 2021 Sep 1;10(9):1821. doi: 10.3390/plants10091821 (PMC8467881; doi:10.3390/plants10091821)
Supplement: Supplementary file 1 [file plants-10-01821-s001.zip]

Archive with 4 entries (4 files):
- Figure S2_Meteorological Data.pdf
- Table S9.pdf
- Tables S1-S8.pdf
- Figure S1_Leaf N and K content.pdf
